# Supplementary material for: Pain and Its Association with Survival for Black and White Individuals with Advanced Prostate Cancer in the United States
Source: PubMed Central journal article supplement (PMC10773321; doi:10.1158/2767-9764.crc-23-0446), 2024-01-08
Supplement: crc-23-0446-s11.pdf [file crc-23-0446-s11.pdf]

## Supplementary Figure S2

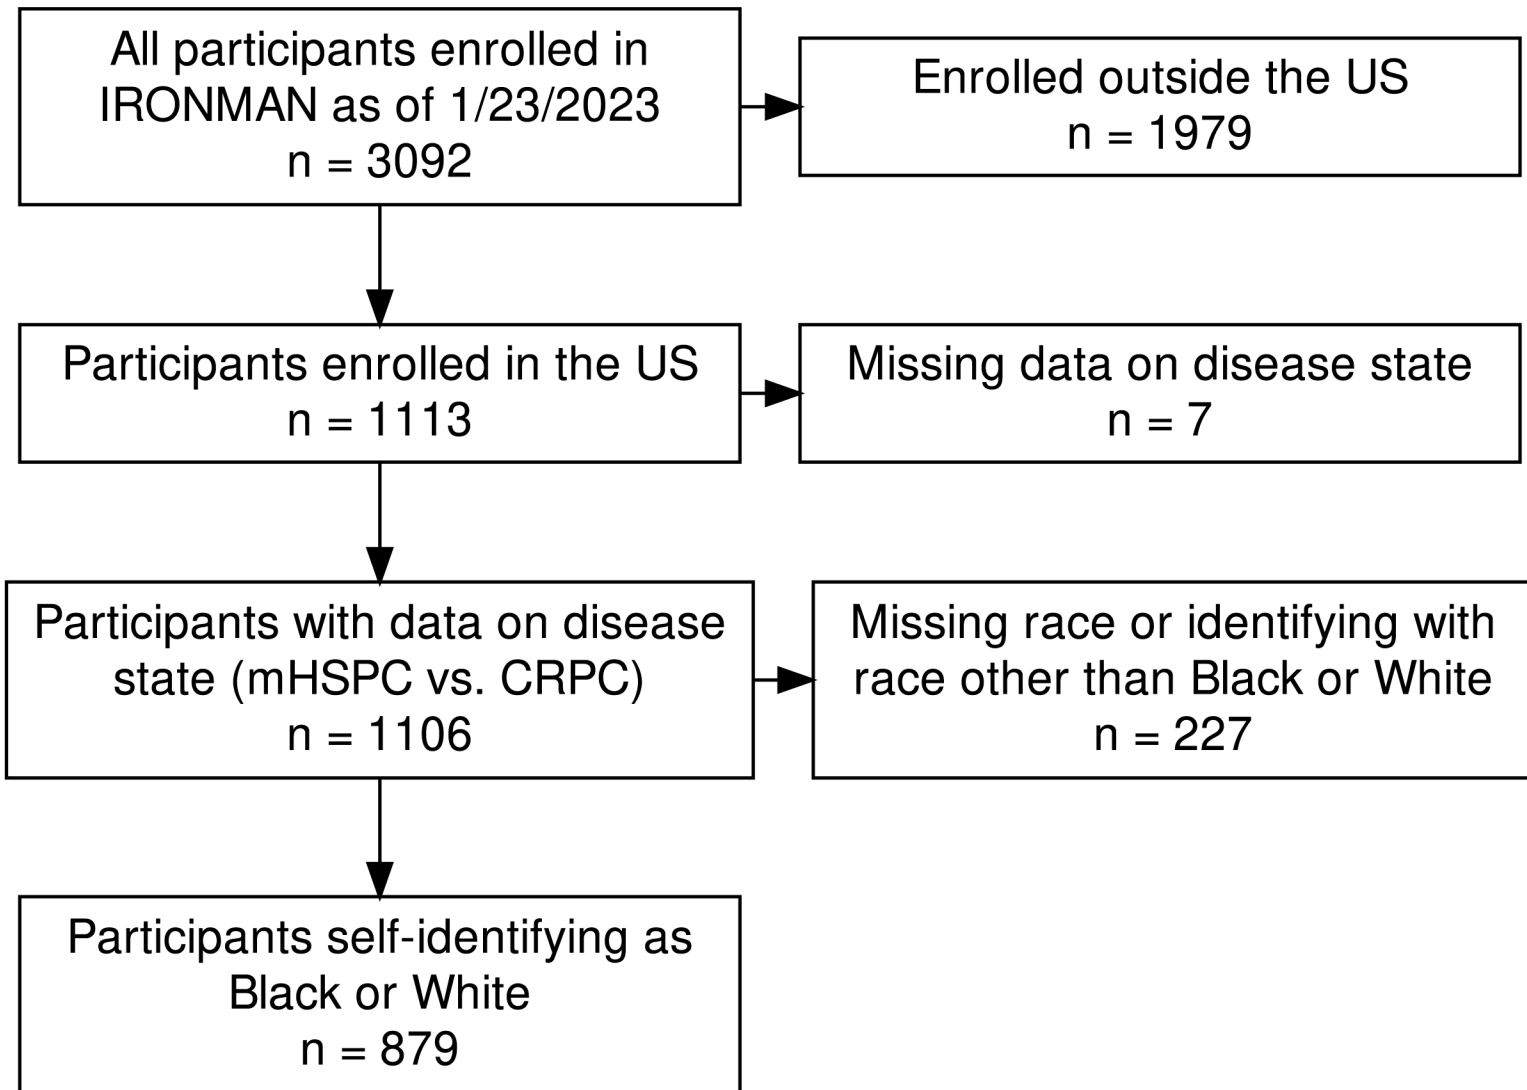

Supplementary Figure S2 shows the exclusion criteria used to define the study population for this analysis.
